# Supplementary material
Source: publisher site journal article supplement (http://www.spandidos-publications.com/6256/downloadSupplementary)

Figure S1. The association between elevated *DANCR* expression and reduced overall survival incidence in KIRC, LIHC, SARC and SKCM. The expression of *DANCR* in HNSC, KICH, PCPG, STAD, THCA and UCEC was not linked to overall survival. HNSC, head and neck squamous cell carcinoma; KICH, kidney chromophobe; KIRC, kidney renal clear cell carcinoma; LIHC, liver hepatocellular carcinoma; PCPG, pheochromocytoma and paraganglioma; SARC, sarcoma; STAD, stomach adenocarcinoma; SKCM, skin cutaneous melanoma; THCA, thyroid carcinoma; UCEC, uterine corpus endometrial carcinoma; HR, hazard ratio.

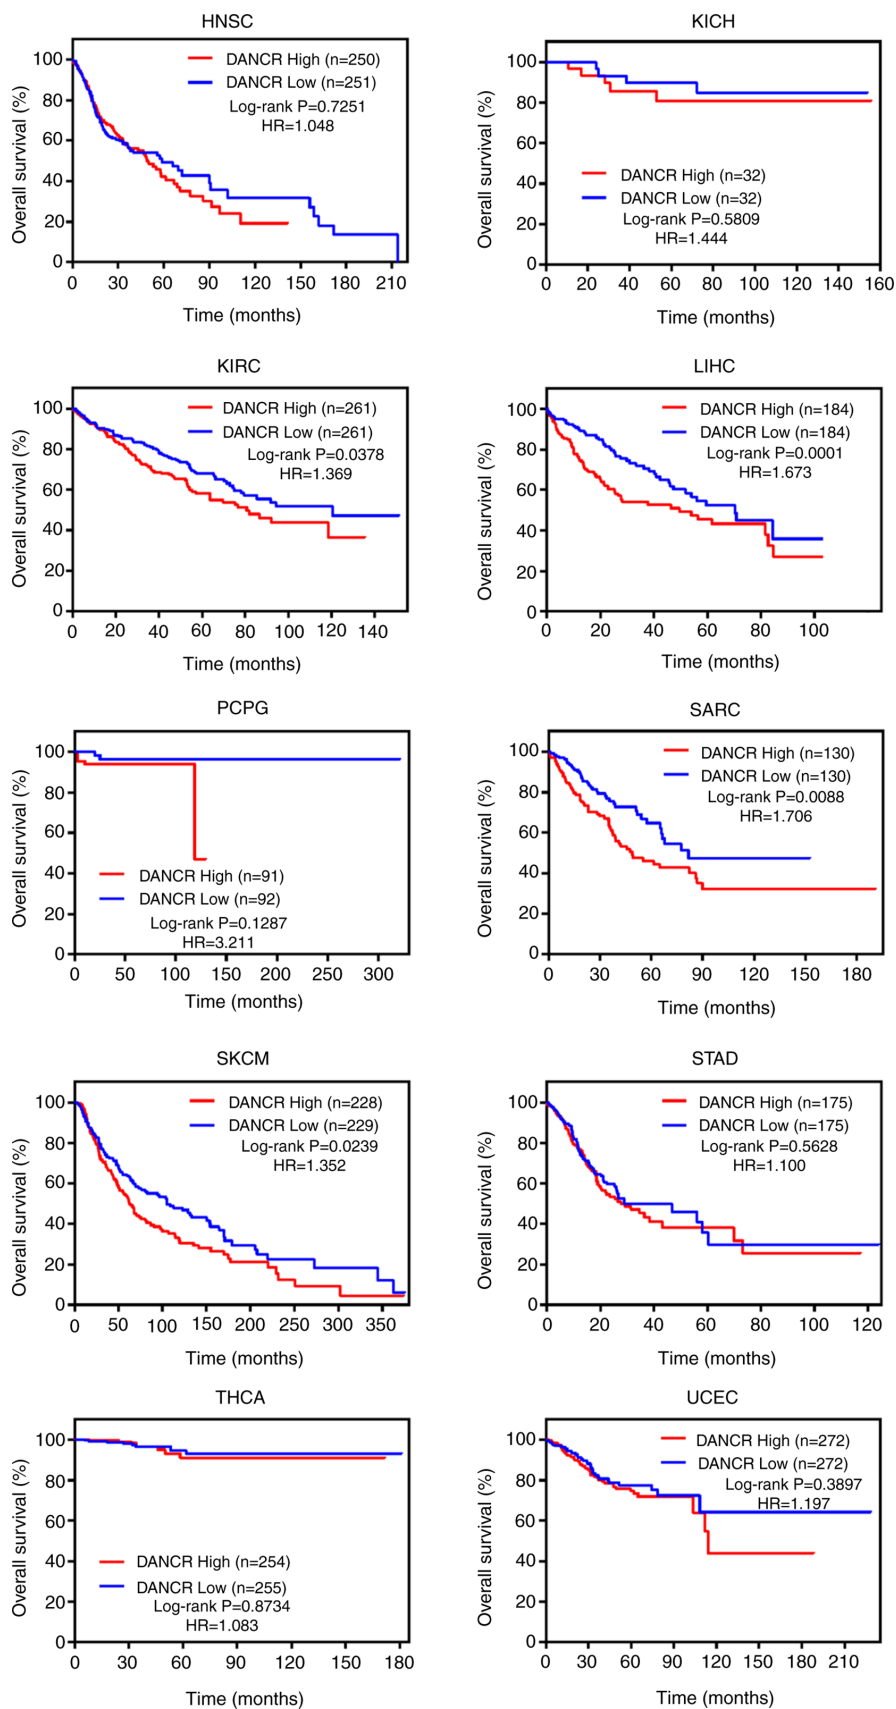

Figure S2. In BLCA, BRCA, CHOL, COAD, ESCA, HNSC, KICH, KIRC, KIRP, LIHC, LUAD, LUSC, PAAD, PCPG, PRAD, READ, SARC, SKCM, STAD, and UCEC, compared with normal tissue, cancer tissue showed hypomethylation and were negatively correlated with the expression of *DANCR*. \* $P < 0.05$ ; \*\* $P < 0.01$ ; \*\*\* $P < 0.001$ ; \*\*\*\* $P < 0.0001$  vs. normal tissue. BLCA, bladder urothelial carcinoma; BRCA, Breast invasive carcinoma; CHOL, Cholangio carcinoma; COAD, colon adenocarcinoma; ESCA, Esophageal carcinoma; HNSC, head and neck squamous cell carcinoma; KICH, kidney chromophobe; KIRC, kidney renal clear cell carcinoma; KIRP, kidney renal papillary cell carcinoma; LIHC, liver hepatocellular carcinoma; LUAD, lung adenocarcinoma; LUSC, lung squamous cell carcinoma; PAAD, Pancreatic adenocarcinoma; PCPG, pheochromocytoma and paraganglioma; PRAD, prostate adenocarcinoma; READ, Rectum adenocarcinoma; SARC, sarcoma; SKCM, skin cutaneous melanoma; STAD, stomach adenocarcinoma; UCEC, uterine corpus endometrial carcinoma. ns, no significance.

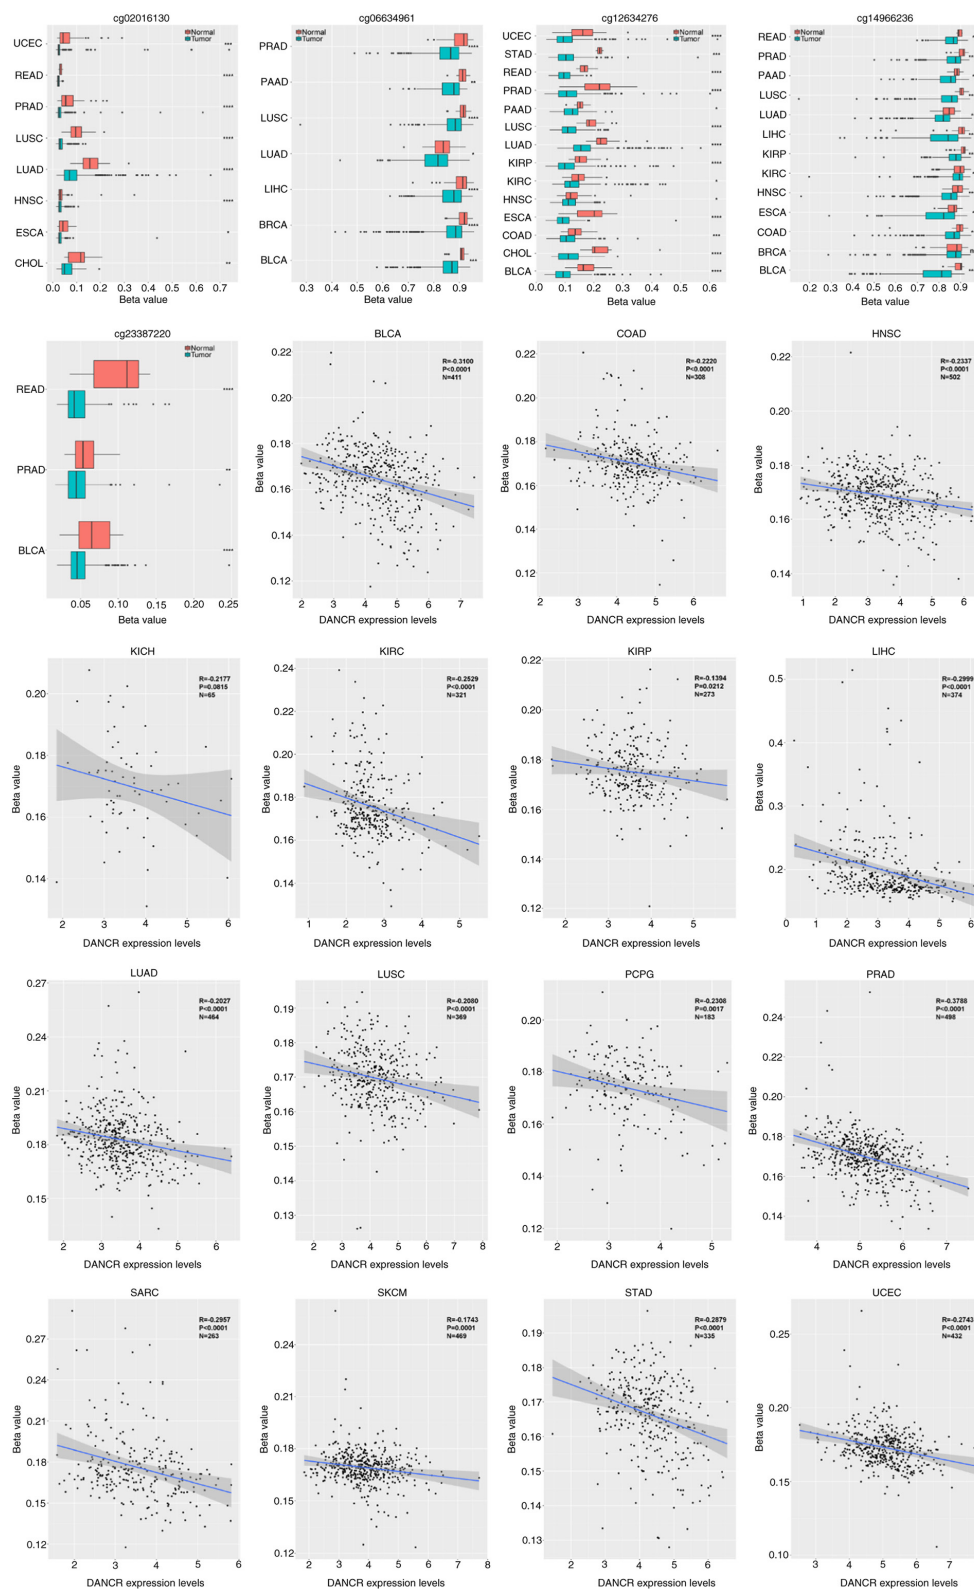

Figure S3. (A) Downregulation of *miR-34c-5p* significantly promoted the expression of *DANCR* in MCF7 and MDA-MB-231 cells. (B) The transfection efficiency of the *miR-34c-5p* inhibitor. (C) The transfection efficiency of *miR-34c-5p* mimic. (D) The transfection efficiency of pcDNA3.1 *DANCR*. (E) The transfection efficiency of si-E2F1. (F) The transfection efficiency of sh-*DANCR*. \*\*P<0.01; \*\*\*P<0.001; \*\*\*\*P<0.0001. *DANCR*, differentiation antagonizing non-protein coding RNA; E2F1, E2F transcription factor 1; miR, microRNA; NC, negative control; si, small interfering RNA; sh, short hairpin RNA.

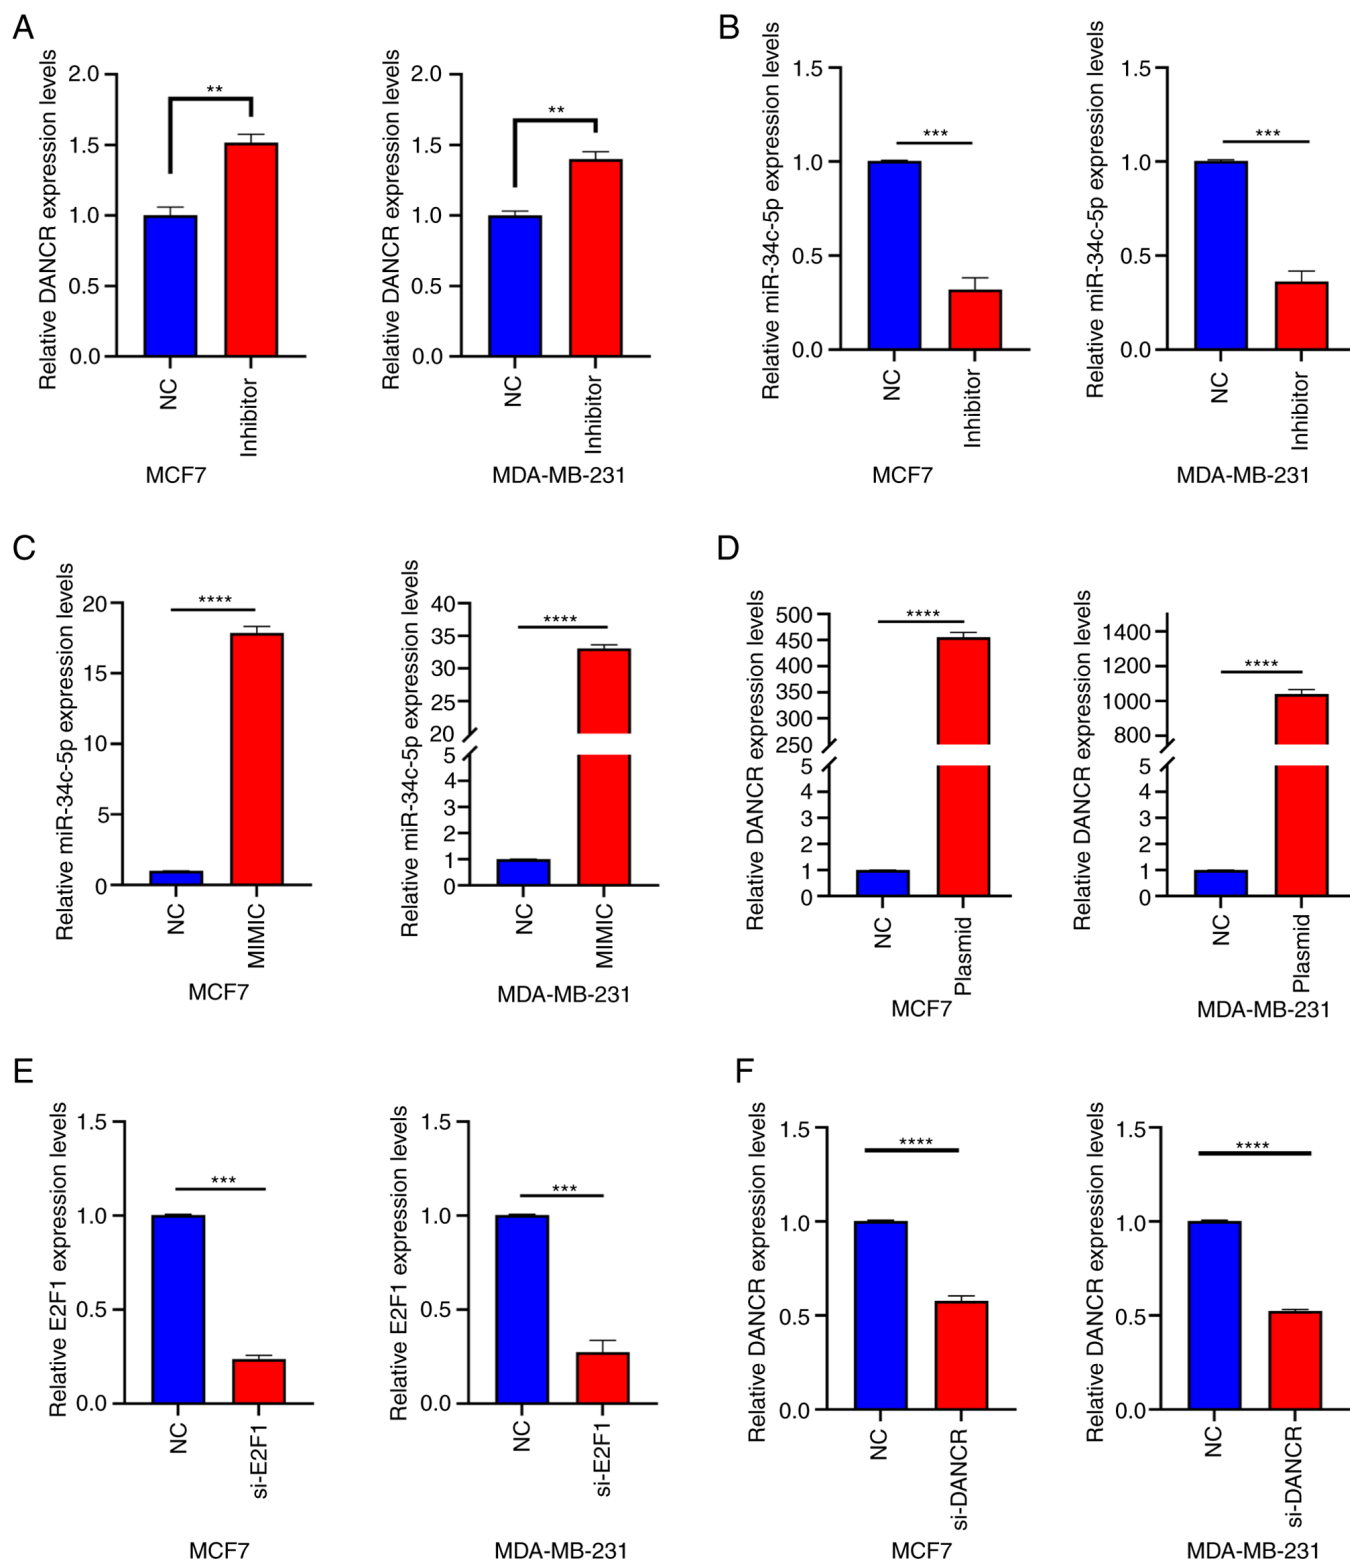

Supplement: Supplementary file 1 [file downloadSupplementary]
